# Supplementary material for: Knowledge of the physical activity guidelines and factors associated with physical activity participation among adults in Harar town, eastern Ethiopia
Source: PubMed Central journal article supplement — BMJ Open Sport Exerc Med. 2019 Jan 29;5(1):e000463. doi: 10.1136/bmjsem-2018-000463 (PMC6352836; doi:10.1136/bmjsem-2018-000463), 2019-01-29
Supplement: bmjsem-2018-000463supp001.pdf [file bmjsem-2018-000463supp001.pdf]

|      |   |    |   |   |   |   |   |   |   |   |   |
|------|---|----|---|---|---|---|---|---|---|---|---|
| 24   | 1 | 18 | 1 | 1 | 3 | 1 | 4 | 1 | 2 | 2 | 1 |
| 21   | 2 | 33 | 2 | 1 | 1 | 2 | 2 | 2 | 2 | 2 | 1 |
| 22   | 1 | 44 | 3 | 2 | 2 | 2 | 2 | 2 | 2 | 2 | 1 |
| 26   | 1 | 33 | 2 | 1 | 3 | 3 | 3 | 2 | 2 | 2 | 1 |
| 213  | 2 | 48 | 3 | 2 | 4 | 4 | 3 | 2 | 2 | 2 | 1 |
| 212  | 2 | 31 | 2 | 1 | 3 | 3 | 3 | 2 | 2 | 2 | 1 |
| 29   | 2 | 38 | 2 | 2 | 1 | 1 | 4 | 2 | 2 | 2 | 1 |
| 27   | 1 | 48 | 3 | 1 | 2 | 3 | 2 | 2 | 2 | 2 | 1 |
| 28   | 2 | 28 | 1 | 2 | 2 | 3 | 1 | 2 | 2 | 2 | 2 |
| 215  | 2 | 22 | 1 | 2 | 2 | 2 | 3 | 2 | 2 | 2 | 1 |
| 214  | 1 | 20 | 1 | 2 | 1 | 3 | 3 | 2 | 2 | 2 | 2 |
| 217  | 2 | 64 | 4 | 1 | 2 | 3 | 2 | 2 | 2 | 2 | 1 |
| 216  | 2 | 50 | 3 | 2 | 3 | 2 | 2 | 2 | 2 | 2 | 2 |
| 513  | 1 | 35 | 2 | 2 | 3 | 3 | 1 | 2 | 2 | 2 | 1 |
| 515  | 1 | 27 | 1 | 1 | 2 | 2 | 3 | 2 | 2 | 2 | 1 |
| 552  | 2 | 55 | 4 | 2 | 3 | 3 | 3 | 2 | 2 | 2 | 2 |
| 557  | 1 | 20 | 1 | 1 | 2 | 1 | 2 | 2 | 2 | 2 | 1 |
| 528  | 1 | 46 | 3 | 1 | 2 | 3 | 1 | 1 | 2 | 2 | 2 |
| 522  | 2 | 22 | 1 | 1 | 4 | 2 | 2 | 2 | 2 | 2 | 1 |
| 530  | 1 | 23 | 1 | 1 | 2 | 3 | 3 | 2 | 2 | 2 | 1 |
| 531  | 1 | 30 | 1 | 2 | 3 | 2 | 2 | 2 | 2 | 1 | 2 |
| 554  | 1 | 33 | 2 | 2 | 1 | 3 | 2 | 1 | 2 | 2 | 1 |
| 521  | 1 | 19 | 1 | 2 | 3 | 3 | 3 | 2 | 2 | 2 | 1 |
| 524  | 1 | 19 | 1 | 1 | 4 | 2 | 2 | 2 | 2 | 2 | 1 |
| 523  | 2 | 18 | 1 | 1 | 3 | 1 | 1 | 2 | 2 | 2 | 1 |
| 555  | 1 | 26 | 1 | 1 | 2 | 3 | 3 | 2 | 2 | 2 | 1 |
| 556  | 2 | 40 | 2 | 1 | 3 | 2 | 2 | 2 | 2 | 2 | 1 |
| 558  | 1 | 26 | 1 | 2 | 1 | 2 | 2 | 2 | 2 | 2 | 1 |
| 559  | 1 | 22 | 1 | 1 | 1 | 1 | 1 | 2 | 2 | 2 | 1 |
| 560  | 2 | 28 | 1 | 1 | 3 | 3 | 1 | 2 | 2 | 2 | 1 |
| 56   | 1 | 27 | 1 | 2 | 3 | 3 | 4 | 2 | 2 | 2 | 2 |
| 561  | 2 | 25 | 1 | 1 | 4 | 3 | 2 | 2 | 2 | 2 | 1 |
| 5622 | 2 | 60 | 4 | 2 | 3 | 3 | 2 | 2 | 2 | 2 | 2 |
| 54   | 2 | 24 | 1 | 2 | 2 | 1 | 1 | 2 | 2 | 2 | 1 |
| 55   | 2 | 21 | 1 | 2 | 4 | 1 | 1 | 1 | 2 | 2 | 1 |
| 53   | 2 | 21 | 1 | 2 | 3 | 3 | 4 | 1 | 1 | 2 | 1 |
| 51   | 2 | 20 | 1 | 2 | 2 | 3 | 4 | 2 | 2 | 2 | 2 |
| 534  | 1 | 20 | 1 | 1 | 3 | 2 | 2 | 2 | 2 | 2 | 2 |
| 52   | 2 | 20 | 1 | 1 | 2 | 3 | 2 | 2 | 2 | 2 | 1 |
| 541  | 2 | 19 | 1 | 2 | 4 | 1 | 2 | 2 | 2 | 2 | 1 |
| 542  | 2 | 33 | 2 | 2 | 3 | 4 | 2 | 2 | 2 | 2 | 2 |
| 536  | 2 | 28 | 1 | 2 | 3 | 2 | 2 | 2 | 2 | 2 | 2 |
| 519  | 2 | 22 | 1 | 2 | 3 | 3 | 2 | 2 | 2 | 2 | 2 |
| 537  | 2 | 20 | 1 | 2 | 3 | 1 | 1 | 1 | 2 | 2 | 2 |
| 538  | 1 | 35 | 2 | 2 | 3 | 3 | 3 | 2 | 2 | 2 | 2 |
| 549  | 1 | 20 | 1 | 2 | 3 | 3 | 2 | 1 | 1 | 2 | 2 |
| 533  | 2 | 30 | 1 | 1 | 2 | 2 | 1 | 2 | 2 | 2 | 1 |
| 551  | 1 | 23 | 1 | 2 | 1 | 3 | 1 | 2 | 2 | 2 | 1 |
| 535  | 2 | 35 | 2 | 1 | 3 | 2 | 2 | 2 | 2 | 2 | 2 |

|      |   |    |   |   |   |   |   |   |   |   |   |
|------|---|----|---|---|---|---|---|---|---|---|---|
| 540  | 2 | 61 | 4 | 2 | 1 | 2 | 2 | 1 | 2 | 2 | 1 |
| 550  | 2 | 56 | 4 | 2 | 3 | 3 | 2 | 2 | 2 | 2 | 1 |
| 546  | 2 | 28 | 1 | 2 | 3 | 2 | 4 | 1 | 1 | 2 | 2 |
| 544  | 2 | 22 | 1 | 2 | 3 | 3 | 1 | 1 | 1 | 2 | 1 |
| 543  | 1 | 24 | 1 | 2 | 3 | 1 | 1 | 2 | 2 | 1 | 1 |
| 518  | 2 | 32 | 2 | 2 | 2 | 2 | 1 | 1 | 2 | 2 | 1 |
| 57   | 1 | 23 | 1 | 2 | 3 | 3 | 1 | 2 | 2 | 2 | 1 |
| 58   | 1 | 29 | 1 | 1 | 4 | 3 | 2 | 2 | 2 | 2 | 1 |
| 520  | 1 | 20 | 1 | 2 | 3 | 2 | 3 | 2 | 2 | 2 | 1 |
| 548  | 2 | 30 | 1 | 1 | 3 | 3 | 3 | 1 | 2 | 2 | 2 |
| 547  | 1 | 20 | 1 | 2 | 3 | 3 | 1 | 2 | 2 | 2 | 1 |
| 545  | 2 | 27 | 1 | 1 | 2 | 1 | 4 | 1 | 2 | 2 | 1 |
| 532  | 1 | 22 | 1 | 2 | 2 | 3 | 1 | 1 | 2 | 2 | 1 |
| 539  | 2 | 35 | 2 | 1 | 4 | 2 | 2 | 2 | 2 | 2 | 1 |
| 526  | 2 | 22 | 1 | 2 | 2 | 2 | 1 | 1 | 2 | 2 | 1 |
| 525  | 1 | 21 | 1 | 2 | 3 | 3 | 3 | 2 | 2 | 2 | 1 |
| 59   | 1 | 33 | 2 | 4 | 4 | 3 | 1 | 2 | 2 | 2 | 1 |
| 510  | 2 | 29 | 1 | 2 | 2 | 4 | 2 | 2 | 2 | 2 | 1 |
| 511  | 2 | 25 | 1 | 2 | 4 | 3 | 1 | 2 | 2 | 2 | 1 |
| 512  | 2 | 22 | 1 | 2 | 2 | 3 | 1 | 2 | 2 | 2 | 1 |
| 514  | 2 | 20 | 1 | 2 | 1 | 1 | 3 | 2 | 2 | 2 | 1 |
| 516  | 1 | 22 | 1 | 2 | 2 | 2 | 2 | 2 | 2 | 2 | 1 |
| 527  | 2 | 25 | 1 | 1 | 2 | 4 | 2 | 2 | 2 | 2 | 1 |
| 529  | 1 | 34 | 2 | 2 | 2 | 2 | 2 | 1 | 1 | 1 | 1 |
| 517  | 1 | 28 | 1 | 2 | 2 | 3 | 2 | 2 | 2 | 2 | 1 |
| 569  | 2 | 19 | 1 | 2 | 3 | 2 | 2 | 2 | 2 | 2 | 2 |
| 568  | 1 | 18 | 1 | 1 | 2 | 3 | 4 | 2 | 2 | 2 | 1 |
| 567  | 1 | 22 | 1 | 2 | 2 | 3 | 1 | 2 | 2 | 2 | 1 |
| 565  | 2 | 21 | 1 | 2 | 3 | 2 | 1 | 2 | 2 | 2 | 1 |
| 564  | 2 | 32 | 2 | 4 | 3 | 2 | 1 | 2 | 2 | 2 | 1 |
| 572  | 2 | 19 | 1 | 2 | 3 | 1 | 1 | 2 | 2 | 2 | 1 |
| 571  | 2 | 21 | 1 | 1 | 2 | 2 | 2 | 2 | 1 | 2 | 1 |
| 570  | 2 | 20 | 1 | 2 | 2 | 1 | 2 | 2 | 2 | 2 | 1 |
| 566  | 2 | 18 | 1 | 2 | 2 | 2 | 1 | 2 | 2 | 2 | 1 |
| 563  | 1 | 22 | 1 | 1 | 1 | 3 | 4 | 2 | 2 | 2 | 1 |
| 510  | 1 | 62 | 4 | 3 | 3 | 2 | 3 | 2 | 2 | 2 | 1 |
| 1083 | 1 | 31 | 2 | 2 | 3 | 3 | 4 | 2 | 2 | 2 | 1 |
| 1081 | 1 | 27 | 1 | 1 | 3 | 3 | 2 | 2 | 1 | 1 | 1 |
| 1080 | 2 | 27 | 1 | 2 | 3 | 3 | 4 | 1 | 2 | 2 | 1 |
| 1082 | 1 | 57 | 4 | 2 | 3 | 3 | 2 | 2 | 2 | 1 | 1 |
| 101  | 1 | 25 | 1 | 1 | 2 | 3 | 1 | 2 | 2 | 1 | 1 |
| 102  | 2 | 25 | 1 | 1 | 3 | 3 | 2 | 2 | 2 | 1 | 1 |
| 1012 | 1 | 28 | 1 | 2 | 3 | 3 | 1 | 2 | 2 | 2 | 1 |
| 1065 | 1 | 29 | 1 | 2 | 3 | 3 | 2 | 2 | 2 | 2 | 2 |
| 1064 | 2 | 18 | 1 | 1 | 4 | 3 | 4 | 1 | 2 | 1 | 1 |
| 1014 | 1 | 28 | 1 | 2 | 1 | 3 | 4 | 2 | 2 | 2 | 1 |
| 1048 | 1 | 28 | 1 | 2 | 4 | 1 | 1 | 2 | 2 | 1 | 2 |
| 1047 | 1 | 29 | 1 | 1 | 3 | 2 | 2 | 2 | 2 | 1 | 1 |
| 1046 | 1 | 30 | 1 | 2 | 4 | 3 | 1 | 2 | 2 | 1 | 1 |

|      |   |    |   |   |   |   |   |   |   |   |   |
|------|---|----|---|---|---|---|---|---|---|---|---|
| 1028 | 1 | 27 | 1 | 2 | 3 | 3 | 1 | 1 | 2 | 2 | 1 |
| 1079 | 1 | 35 | 2 | 1 | 4 | 3 | 1 | 2 | 2 | 2 | 1 |
| 1078 | 1 | 20 | 1 | 2 | 4 | 4 | 1 | 2 | 2 | 2 | 1 |
| 1066 | 2 | 32 | 2 | 1 | 1 | 1 | 2 | 2 | 1 | 2 | 2 |
| 1072 | 2 | 22 | 1 | 2 | 2 | 3 | 1 | 2 | 2 | 2 | 2 |
| #### | 2 | 31 | 2 | 1 | 4 | 3 | 2 | 2 | 2 | 2 | 1 |
| 1097 | 2 | 19 | 1 | 2 | 1 | 3 | 1 | 2 | 2 | 2 | 1 |
| 1095 | 1 | 18 | 1 | 2 | 3 | 3 | 1 | 2 | 2 | 2 | 1 |
| 1084 | 2 | 35 | 2 | 1 | 4 | 1 | 2 | 2 | 2 | 2 | 1 |
| 1019 | 1 | 52 | 4 | 2 | 3 | 3 | 3 | 2 | 2 | 2 | 1 |
| 1049 | 2 | 21 | 1 | 3 | 4 | 1 | 4 | 2 | 2 | 1 | 1 |
| 1055 | 1 | 27 | 1 | 2 | 3 | 3 | 2 | 2 | 2 | 2 | 1 |
| 1099 | 1 | 23 | 1 | 1 | 4 | 2 | 4 | 2 | 2 | 2 | 1 |
| 1096 | 1 | 20 | 1 | 1 | 3 | 3 | 4 | 2 | 2 | 2 | 1 |
| 1098 | 2 | 43 | 3 | 1 | 4 | 3 | 2 | 2 | 2 | 2 | 1 |
| #### | 2 | 25 | 1 | 2 | 3 | 3 | 4 | 2 | 2 | 2 | 1 |
| 1077 | 1 | 57 | 4 | 1 | 3 | 2 | 3 | 2 | 2 | 2 | 1 |
| 1068 | 1 | 29 | 1 | 2 | 3 | 2 | 1 | 2 | 2 | 1 | 2 |
| 1018 | 2 | 53 | 4 | 2 | 3 | 3 | 4 | 1 | 2 | 2 | 1 |
| 1017 | 1 | 38 | 2 | 4 | 3 | 3 | 3 | 1 | 2 | 2 | 1 |
| 1016 | 2 | 29 | 1 | 3 | 3 | 3 | 4 | 1 | 2 | 2 | 1 |
| 1090 | 2 | 61 | 4 | 4 | 3 | 1 | 1 | 1 | 2 | 2 | 1 |
| 1089 | 2 | 61 | 4 | 2 | 1 | 4 | 4 | 1 | 2 | 2 | 1 |
| 1088 | 2 | 59 | 4 | 3 | 2 | 1 | 4 | 1 | 2 | 2 | 1 |
| 1086 | 1 | 19 | 1 | 3 | 1 | 3 | 3 | 2 | 2 | 2 | 1 |
| 1087 | 2 | 44 | 3 | 1 | 4 | 2 | 2 | 1 | 1 | 2 | 1 |
| 1085 | 2 | 38 | 2 | 2 | 4 | 3 | 2 | 2 | 2 | 2 | 1 |
| 1060 | 2 | 55 | 4 | 2 | 4 | 2 | 2 | 1 | 1 | 2 | 1 |
| 1059 | 2 | 28 | 1 | 2 | 3 | 2 | 2 | 2 | 2 | 1 | 1 |
| 1058 | 1 | 39 | 2 | 2 | 4 | 3 | 4 | 2 | 2 | 2 | 2 |
| 103  | 2 | 37 | 2 | 2 | 3 | 3 | 1 | 2 | 2 | 1 | 1 |
| 104  | 2 | 64 | 4 | 2 | 3 | 1 | 3 | 2 | 1 | 1 | 2 |
| 105  | 2 | 38 | 2 | 2 | 2 | 2 | 2 | 2 | 2 | 2 | 1 |
| 106  | 2 | 37 | 2 | 2 | 2 | 4 | 4 | 2 | 2 | 1 | 2 |
| 107  | 2 | 38 | 2 | 2 | 3 | 1 | 1 | 2 | 2 | 2 | 1 |
| 108  | 1 | 22 | 1 | 2 | 3 | 2 | 2 | 1 | 1 | 2 | 2 |
| 1010 | 2 | 45 | 3 | 1 | 4 | 3 | 1 | 1 | 1 | 2 | 1 |
| 109  | 2 | 45 | 3 | 2 | 3 | 1 | 1 | 1 | 1 | 2 | 2 |
| 1061 | 1 | 30 | 1 | 2 | 2 | 1 | 1 | 1 | 2 | 1 | 2 |
| 1062 | 1 | 24 | 1 | 2 | 4 | 2 | 2 | 2 | 2 | 1 | 2 |
| 1063 | 2 | 45 | 3 | 1 | 2 | 3 | 1 | 1 | 1 | 2 | 1 |
| 1029 | 2 | 18 | 1 | 2 | 2 | 2 | 2 | 2 | 2 | 2 | 1 |
| 1030 | 2 | 35 | 2 | 1 | 2 | 3 | 1 | 2 | 2 | 2 | 2 |
| 1032 | 1 | 36 | 2 | 2 | 1 | 3 | 1 | 2 | 2 | 2 | 1 |
| 1033 | 1 | 37 | 2 | 2 | 2 | 3 | 4 | 2 | 2 | 2 | 2 |
| 1034 | 2 | 50 | 3 | 1 | 3 | 2 | 2 | 2 | 2 | 2 | 1 |
| 1035 | 2 | 28 | 1 | 2 | 2 | 2 | 2 | 2 | 2 | 2 | 1 |
| 1031 | 2 | 23 | 1 | 2 | 4 | 3 | 4 | 2 | 2 | 2 | 1 |
| 1036 | 2 | 21 | 1 | 2 | 3 | 3 | 4 | 2 | 2 | 2 | 1 |

|      |   |    |   |   |   |   |   |   |   |   |   |
|------|---|----|---|---|---|---|---|---|---|---|---|
| 1037 | 2 | 33 | 2 | 1 | 2 | 2 | 2 | 2 | 2 | 2 | 2 |
| 1038 | 2 | 19 | 1 | 2 | 3 | 2 | 2 | 2 | 2 | 2 | 1 |
| 1039 | 2 | 26 | 1 | 1 | 3 | 3 | 4 | 2 | 1 | 2 | 1 |
| 1040 | 2 | 24 | 1 | 1 | 1 | 1 | 2 | 2 | 2 | 2 | 1 |
| 1094 | 1 | 22 | 1 | 1 | 4 | 3 | 4 | 2 | 2 | 1 | 1 |
| 1093 | 1 | 40 | 2 | 2 | 4 | 2 | 2 | 2 | 2 | 2 | 1 |
| 1091 | 1 | 29 | 1 | 2 | 2 | 2 | 2 | 2 | 2 | 2 | 1 |
| 1092 | 1 | 28 | 1 | 2 | 3 | 1 | 2 | 2 | 2 | 2 | 1 |
| 1026 | 2 | 52 | 4 | 1 | 3 | 3 | 1 | 1 | 2 | 2 | 2 |
| 1021 | 1 | 30 | 1 | 2 | 2 | 3 | 4 | 2 | 1 | 1 | 2 |
| 1013 | 2 | 19 | 1 | 2 | 3 | 1 | 4 | 2 | 2 | 2 | 1 |
| 1011 | 2 | 18 | 1 | 1 | 3 | 2 | 1 | 1 | 2 | 1 | 2 |
| 1069 | 1 | 28 | 1 | 1 | 4 | 3 | 4 | 2 | 2 | 2 | 1 |
| 1024 | 1 | 29 | 1 | 1 | 4 | 3 | 2 | 2 | 2 | 2 | 2 |
| 1023 | 1 | 30 | 1 | 2 | 3 | 2 | 2 | 2 | 2 | 2 | 2 |
| 1074 | 1 | 30 | 1 | 1 | 3 | 2 | 2 | 2 | 2 | 2 | 1 |
| 1073 | 2 | 33 | 2 | 2 | 3 | 2 | 2 | 2 | 2 | 2 | 2 |
| 1056 | 2 | 25 | 1 | 2 | 4 | 3 | 3 | 2 | 2 | 2 | 1 |
| 1057 | 1 | 30 | 1 | 2 | 4 | 2 | 2 | 2 | 2 | 2 | 1 |
| 1022 | 2 | 20 | 1 | 2 | 2 | 3 | 1 | 2 | 2 | 1 | 2 |
| 1027 | 2 | 30 | 1 | 1 | 3 | 3 | 2 | 2 | 2 | 2 | 2 |
| 1075 | 2 | 27 | 1 | 1 | 4 | 1 | 1 | 2 | 2 | 2 | 2 |
| 1076 | 2 | 22 | 1 | 2 | 2 | 3 | 1 | 2 | 2 | 2 | 1 |
| 1070 | 2 | 26 | 1 | 2 | 4 | 2 | 2 | 2 | 2 | 2 | 1 |
| 1071 | 2 | 22 | 1 | 1 | 3 | 3 | 4 | 2 | 2 | 2 | 1 |
| 1041 | 2 | 26 | 1 | 1 | 4 | 3 | 2 | 2 | 2 | 2 | 2 |
| 1042 | 2 | 64 | 4 | 2 | 4 | 2 | 1 | 2 | 2 | 2 | 1 |
| 1043 | 2 | 53 | 4 | 2 | 4 | 3 | 4 | 2 | 2 | 2 | 1 |
| 1044 | 1 | 28 | 1 | 2 | 3 | 2 | 2 | 2 | 2 | 2 | 1 |
| 1050 | 2 | 57 | 4 | 1 | 3 | 1 | 3 | 2 | 2 | 1 | 1 |
| 1045 | 1 | 28 | 1 | 2 | 1 | 1 | 3 | 1 | 2 | 2 | 2 |
| 1051 | 1 | 35 | 2 | 2 | 3 | 3 | 1 | 2 | 1 | 2 | 2 |
| 1052 | 2 | 54 | 4 | 1 | 3 | 1 | 3 | 2 | 2 | 1 | 2 |
| 1053 | 2 | 38 | 2 | 2 | 3 | 2 | 2 | 2 | 2 | 2 | 2 |
| 1054 | 2 | 39 | 2 | 2 | 3 | 3 | 1 | 2 | 2 | 1 | 2 |
| 1020 | 1 | 25 | 1 | 1 | 3 | 3 | 1 | 2 | 2 | 2 | 1 |
| 1025 | 1 | 29 | 1 | 1 | 3 | 2 | 2 | 2 | 2 | 2 | 2 |
| 1318 | 2 | 50 | 3 | 1 | 4 | 3 | 2 | 1 | 2 | 1 | 1 |
| 1338 | 2 | 30 | 1 | 2 | 3 | 3 | 1 | 2 | 1 | 2 | 1 |
| 1343 | 2 | 35 | 2 | 2 | 4 | 3 | 1 | 2 | 2 | 2 | 1 |
| 133  | 2 | 31 | 2 | 2 | 4 | 3 | 1 | 2 | 2 | 2 | 1 |
| 132  | 1 | 27 | 1 | 1 | 3 | 1 | 1 | 1 | 2 | 2 | 1 |
| 1310 | 2 | 29 | 1 | 2 | 3 | 1 | 2 | 2 | 2 | 1 | 1 |
| 1333 | 2 | 25 | 1 | 2 | 3 | 2 | 4 | 2 | 2 | 1 | 1 |
| 1342 | 2 | 18 | 1 | 1 | 3 | 3 | 1 | 2 | 2 | 2 | 1 |
| 1359 | 1 | 27 | 1 | 1 | 4 | 1 | 3 | 1 | 2 | 2 | 1 |
| 1340 | 2 | 18 | 1 | 2 | 3 | 3 | 3 | 2 | 2 | 2 | 1 |
| 1358 | 2 | 24 | 1 | 2 | 3 | 3 | 1 | 2 | 2 | 1 | 1 |
| 1363 | 1 | 23 | 1 | 2 | 3 | 3 | 3 | 2 | 2 | 1 | 2 |

|      |   |    |   |   |   |   |   |   |   |   |   |
|------|---|----|---|---|---|---|---|---|---|---|---|
| 1314 | 2 | 55 | 4 | 2 | 4 | 3 | 4 | 2 | 2 | 2 | 1 |
| 1334 | 2 | 20 | 1 | 2 | 3 | 2 | 1 | 2 | 2 | 2 | 2 |
| 1332 | 2 | 19 | 1 | 1 | 4 | 3 | 1 | 2 | 2 | 2 | 1 |
| 1331 | 2 | 56 | 4 | 2 | 4 | 1 | 1 | 2 | 2 | 2 | 1 |
| 1337 | 1 | 24 | 1 | 1 | 4 | 1 | 1 | 1 | 1 | 1 | 1 |
| 1315 | 1 | 42 | 3 | 2 | 2 | 2 | 1 | 2 | 2 | 2 | 1 |
| 1357 | 2 | 29 | 1 | 2 | 4 | 2 | 2 | 2 | 1 | 2 | 1 |
| 1360 | 1 | 27 | 1 | 2 | 3 | 1 | 3 | 2 | 2 | 2 | 1 |
| 1361 | 1 | 26 | 1 | 1 | 4 | 3 | 1 | 2 | 2 | 1 | 1 |
| 1354 | 1 | 20 | 1 | 2 | 4 | 3 | 2 | 2 | 2 | 2 | 2 |
| 1362 | 1 | 28 | 1 | 2 | 4 | 3 | 2 | 2 | 2 | 1 | 2 |
| 1319 | 2 | 20 | 1 | 1 | 3 | 3 | 1 | 2 | 2 | 2 | 1 |
| 1327 | 1 | 20 | 1 | 1 | 4 | 3 | 1 | 1 | 2 | 1 | 2 |
| 136  | 2 | 21 | 1 | 2 | 2 | 1 | 3 | 2 | 2 | 1 | 1 |
| 1326 | 1 | 28 | 1 | 2 | 4 | 3 | 2 | 2 | 2 | 1 | 1 |
| 1324 | 2 | 43 | 3 | 2 | 3 | 2 | 2 | 2 | 2 | 2 | 1 |
| 1320 | 2 | 21 | 1 | 2 | 4 | 3 | 2 | 1 | 1 | 1 | 1 |
| 1317 | 2 | 40 | 2 | 2 | 2 | 2 | 3 | 2 | 1 | 2 | 2 |
| 138  | 2 | 43 | 3 | 4 | 2 | 3 | 4 | 2 | 2 | 1 | 2 |
| 1316 | 2 | 45 | 3 | 2 | 3 | 3 | 3 | 2 | 2 | 1 | 1 |
| 1311 | 2 | 36 | 2 | 2 | 4 | 1 | 2 | 2 | 2 | 1 | 1 |
| 1335 | 2 | 20 | 1 | 2 | 3 | 2 | 2 | 2 | 2 | 2 | 1 |
| 1353 | 2 | 28 | 1 | 2 | 3 | 3 | 2 | 2 | 1 | 1 | 1 |
| 1352 | 2 | 19 | 1 | 1 | 3 | 3 | 1 | 2 | 2 | 2 | 1 |
| 1347 | 2 | 20 | 1 | 2 | 2 | 3 | 1 | 2 | 2 | 2 | 1 |
| 1349 | 2 | 18 | 1 | 1 | 2 | 2 | 2 | 2 | 1 | 2 | 1 |
| 1350 | 2 | 22 | 1 | 2 | 2 | 1 | 3 | 2 | 2 | 1 | 1 |
| 1345 | 2 | 30 | 1 | 2 | 2 | 3 | 2 | 2 | 2 | 2 | 2 |
| 1330 | 1 | 23 | 1 | 2 | 1 | 3 | 2 | 1 | 2 | 2 | 1 |
| 1341 | 2 | 27 | 1 | 1 | 4 | 2 | 2 | 2 | 2 | 1 | 1 |
| 1336 | 2 | 30 | 1 | 1 | 3 | 1 | 2 | 2 | 2 | 2 | 1 |
| 1339 | 2 | 18 | 1 | 1 | 2 | 3 | 1 | 2 | 2 | 2 | 2 |
| 134  | 2 | 27 | 1 | 1 | 4 | 2 | 2 | 2 | 1 | 1 | 1 |
| 1329 | 2 | 39 | 2 | 2 | 2 | 1 | 2 | 2 | 2 | 2 | 1 |
| 139  | 1 | 33 | 2 | 1 | 4 | 3 | 1 | 1 | 2 | 1 | 1 |
| 1321 | 2 | 35 | 2 | 2 | 3 | 2 | 2 | 2 | 2 | 1 | 1 |
| 1344 | 2 | 19 | 1 | 2 | 3 | 3 | 2 | 2 | 2 | 1 | 2 |
| 1351 | 1 | 21 | 1 | 1 | 2 | 2 | 1 | 2 | 2 | 1 | 1 |
| 1346 | 2 | 18 | 1 | 1 | 3 | 3 | 1 | 2 | 2 | 2 | 2 |
| 1356 | 2 | 36 | 2 | 1 | 3 | 3 | 1 | 2 | 2 | 2 | 1 |
| 1355 | 2 | 30 | 1 | 2 | 2 | 3 | 4 | 2 | 2 | 2 | 1 |
| 137  | 1 | 20 | 1 | 2 | 4 | 3 | 2 | 2 | 2 | 2 | 1 |
| 135  | 2 | 26 | 1 | 2 | 3 | 1 | 3 | 2 | 2 | 2 | 1 |
| 1325 | 1 | 37 | 2 | 2 | 3 | 2 | 2 | 2 | 2 | 1 | 1 |
| 1322 | 2 | 55 | 4 | 2 | 4 | 3 | 2 | 2 | 2 | 2 | 1 |
| 1323 | 2 | 64 | 4 | 2 | 2 | 1 | 2 | 2 | 2 | 2 | 1 |
| 1312 | 2 | 20 | 1 | 2 | 1 | 3 | 4 | 2 | 2 | 1 | 1 |
| 1313 | 2 | 23 | 1 | 1 | 3 | 2 | 1 | 2 | 2 | 2 | 1 |
| 1328 | 2 | 25 | 1 | 2 | 4 | 3 | 1 | 2 | 2 | 2 | 1 |

|      |   |    |   |   |   |   |   |   |   |   |   |
|------|---|----|---|---|---|---|---|---|---|---|---|
| 131  | 2 | 40 | 2 | 2 | 1 | 2 | 2 | 2 | 2 | 2 | 1 |
| 1428 | 1 | 18 | 1 | 2 | 4 | 2 | 2 | 2 | 1 | 2 | 1 |
| 1436 | 1 | 26 | 1 | 1 | 3 | 1 | 2 | 2 | 2 | 2 | 1 |
| 1438 | 1 | 62 | 4 | 2 | 3 | 1 | 3 | 2 | 1 | 1 | 1 |
| 1441 | 1 | 50 | 3 | 2 | 1 | 3 | 1 | 2 | 2 | 2 | 2 |
| 1444 | 1 | 28 | 1 | 1 | 3 | 3 | 2 | 2 | 2 | 2 | 1 |
| 1445 | 2 | 52 | 4 | 2 | 4 | 1 | 2 | 2 | 2 | 2 | 1 |
| 1464 | 1 | 20 | 1 | 1 | 2 | 3 | 2 | 1 | 2 | 1 | 2 |
| 1463 | 1 | 54 | 4 | 2 | 3 | 3 | 2 | 2 | 2 | 2 | 1 |
| 1462 | 1 | 34 | 2 | 1 | 3 | 3 | 2 | 2 | 1 | 2 | 2 |
| 1421 | 1 | 37 | 2 | 2 | 4 | 2 | 1 | 2 | 2 | 1 | 1 |
| 146  | 1 | 24 | 1 | 1 | 4 | 1 | 1 | 2 | 1 | 2 | 2 |
| 145  | 1 | 27 | 1 | 2 | 4 | 3 | 2 | 2 | 2 | 2 | 2 |
| 143  | 1 | 26 | 1 | 2 | 4 | 1 | 3 | 2 | 1 | 2 | 2 |
| 142  | 1 | 40 | 2 | 2 | 4 | 3 | 1 | 2 | 2 | 2 | 1 |
| 1479 | 1 | 29 | 1 | 1 | 4 | 4 | 2 | 2 | 2 | 2 | 1 |
| 1477 | 1 | 29 | 1 | 1 | 4 | 3 | 3 | 2 | 1 | 2 | 1 |
| 1481 | 2 | 30 | 1 | 1 | 3 | 1 | 4 | 2 | 2 | 2 | 1 |
| 1486 | 1 | 32 | 2 | 2 | 1 | 2 | 2 | 2 | 2 | 2 | 1 |
| 1419 | 1 | 50 | 3 | 2 | 1 | 3 | 1 | 2 | 1 | 2 | 1 |
| 1412 | 2 | 59 | 4 | 4 | 4 | 2 | 2 | 2 | 2 | 2 | 2 |
| 1417 | 2 | 33 | 2 | 2 | 4 | 1 | 1 | 2 | 2 | 2 | 2 |
| 1416 | 2 | 40 | 2 | 2 | 1 | 3 | 1 | 1 | 2 | 2 | 1 |
| 1418 | 2 | 25 | 1 | 2 | 2 | 1 | 2 | 1 | 1 | 2 | 1 |
| 1483 | 2 | 59 | 4 | 2 | 3 | 3 | 2 | 2 | 2 | 2 | 1 |
| 1490 | 2 | 45 | 3 | 2 | 4 | 1 | 4 | 1 | 1 | 2 | 1 |
| 1489 | 1 | 49 | 3 | 2 | 3 | 3 | 1 | 2 | 2 | 2 | 1 |
| 1488 | 1 | 39 | 2 | 2 | 3 | 1 | 2 | 2 | 1 | 2 | 1 |
| 1420 | 1 | 40 | 2 | 2 | 1 | 2 | 1 | 2 | 1 | 2 | 1 |
| 144  | 2 | 25 | 1 | 2 | 1 | 3 | 4 | 2 | 1 | 1 | 2 |
| 141  | 2 | 35 | 2 | 1 | 4 | 1 | 4 | 1 | 1 | 2 | 1 |
| 1478 | 2 | 24 | 1 | 2 | 3 | 3 | 1 | 2 | 2 | 1 | 2 |
| 1472 | 1 | 38 | 2 | 1 | 2 | 3 | 3 | 2 | 1 | 1 | 2 |
| 1470 | 2 | 20 | 1 | 1 | 3 | 1 | 2 | 2 | 1 | 2 | 1 |
| 1467 | 2 | 28 | 1 | 1 | 3 | 3 | 2 | 2 | 2 | 2 | 2 |
| 1466 | 2 | 40 | 2 | 2 | 1 | 3 | 2 | 1 | 1 | 1 | 1 |
| 147  | 2 | 25 | 1 | 1 | 2 | 1 | 3 | 1 | 2 | 2 | 1 |
| 1415 | 2 | 18 | 1 | 1 | 3 | 1 | 1 | 2 | 2 | 2 | 1 |
| 1413 | 1 | 25 | 1 | 2 | 4 | 1 | 1 | 2 | 2 | 2 | 1 |
| 1476 | 1 | 22 | 1 | 2 | 2 | 1 | 1 | 1 | 2 | 2 | 1 |
| 1411 | 1 | 23 | 1 | 2 | 4 | 2 | 2 | 1 | 1 | 2 | 1 |
| 1422 | 1 | 61 | 4 | 3 | 2 | 2 | 1 | 2 | 2 | 2 | 1 |
| 1423 | 2 | 47 | 3 | 5 | 3 | 2 | 1 | 2 | 2 | 2 | 1 |
| 1424 | 1 | 56 | 4 | 2 | 4 | 3 | 3 | 2 | 2 | 2 | 1 |
| 1461 | 1 | 28 | 1 | 2 | 1 | 4 | 2 | 2 | 2 | 1 | 1 |
| 1460 | 1 | 29 | 1 | 2 | 2 | 3 | 1 | 2 | 1 | 2 | 2 |
| 1459 | 2 | 20 | 1 | 1 | 1 | 2 | 2 | 1 | 2 | 1 | 2 |
| 1457 | 1 | 23 | 1 | 2 | 4 | 3 | 4 | 1 | 1 | 2 | 2 |
| 1455 | 2 | 36 | 2 | 2 | 2 | 3 | 4 | 2 | 2 | 2 | 1 |

|      |   |    |   |   |   |   |   |   |   |   |   |
|------|---|----|---|---|---|---|---|---|---|---|---|
| 1454 | 1 | 30 | 1 | 2 | 4 | 3 | 3 | 2 | 2 | 2 | 2 |
| 1453 | 2 | 22 | 1 | 2 | 3 | 3 | 4 | 2 | 1 | 2 | 1 |
| 1452 | 2 | 20 | 1 | 2 | 4 | 2 | 4 | 1 | 1 | 1 | 1 |
| 1450 | 2 | 64 | 4 | 2 | 2 | 3 | 1 | 2 | 2 | 2 | 2 |
| 1449 | 1 | 28 | 1 | 2 | 2 | 3 | 4 | 1 | 1 | 1 | 1 |
| 1447 | 1 | 30 | 1 | 2 | 4 | 3 | 1 | 2 | 2 | 2 | 1 |
| 1480 | 2 | 26 | 1 | 2 | 3 | 1 | 1 | 1 | 1 | 2 | 1 |
| 1482 | 1 | 31 | 2 | 2 | 2 | 3 | 2 | 1 | 1 | 2 | 1 |
| 1487 | 1 | 28 | 1 | 1 | 1 | 3 | 4 | 1 | 1 | 1 | 2 |
| 1485 | 1 | 23 | 1 | 2 | 4 | 3 | 1 | 1 | 1 | 2 | 1 |
| 1494 | 2 | 22 | 1 | 1 | 2 | 3 | 4 | 2 | 2 | 2 | 1 |
| 1492 | 1 | 49 | 3 | 2 | 4 | 1 | 1 | 1 | 2 | 2 | 2 |
| 1493 | 2 | 48 | 3 | 2 | 3 | 3 | 2 | 1 | 2 | 2 | 1 |
| #### | 2 | 47 | 3 | 2 | 4 | 3 | 1 | 2 | 2 | 2 | 1 |
| #### | 2 | 57 | 4 | 2 | 4 | 3 | 1 | 2 | 1 | 2 | 1 |
| #### | 1 | 62 | 4 | 2 | 4 | 3 | 2 | 2 | 1 | 2 | 1 |
| #### | 2 | 49 | 3 | 4 | 4 | 3 | 4 | 2 | 1 | 2 | 1 |
| 1495 | 1 | 56 | 4 | 4 | 4 | 4 | 4 | 1 | 2 | 2 | 1 |
| 1496 | 2 | 51 | 4 | 3 | 4 | 4 | 4 | 2 | 2 | 2 | 1 |
| 1497 | 1 | 59 | 4 | 2 | 3 | 3 | 4 | 1 | 1 | 2 | 1 |
| 1498 | 1 | 63 | 4 | 2 | 4 | 3 | 1 | 1 | 2 | 2 | 2 |
| 1499 | 1 | 22 | 1 | 2 | 4 | 1 | 1 | 2 | 2 | 2 | 1 |
| 1429 | 1 | 26 | 1 | 2 | 2 | 2 | 2 | 1 | 1 | 2 | 2 |
| 1474 | 2 | 22 | 1 | 1 | 3 | 2 | 2 | 2 | 2 | 1 | 1 |
| 1473 | 1 | 30 | 1 | 2 | 4 | 1 | 1 | 2 | 2 | 2 | 1 |
| 1471 | 1 | 24 | 1 | 1 | 4 | 2 | 2 | 2 | 2 | 2 | 1 |
| 1469 | 1 | 25 | 1 | 1 | 4 | 3 | 1 | 2 | 1 | 2 | 2 |
| 1468 | 1 | 30 | 1 | 2 | 4 | 3 | 1 | 2 | 2 | 2 | 1 |
| 149  | 2 | 20 | 1 | 1 | 4 | 3 | 2 | 1 | 1 | 2 | 2 |
| 1491 | 2 | 20 | 1 | 2 | 3 | 3 | 2 | 2 | 1 | 1 | 1 |
| 1484 | 1 | 22 | 1 | 2 | 2 | 3 | 2 | 2 | 2 | 2 | 2 |
| 1431 | 1 | 19 | 1 | 1 | 4 | 2 | 2 | 2 | 2 | 1 | 2 |
| 1475 | 1 | 26 | 1 | 2 | 2 | 2 | 2 | 2 | 1 | 2 | 1 |
| 1414 | 2 | 18 | 1 | 1 | 2 | 2 | 2 | 2 | 2 | 2 | 2 |
| 148  | 1 | 24 | 1 | 1 | 3 | 2 | 2 | 2 | 1 | 2 | 1 |
| 1410 | 1 | 40 | 2 | 2 | 4 | 3 | 1 | 2 | 2 | 2 | 2 |
| 1430 | 1 | 28 | 1 | 1 | 4 | 3 | 1 | 2 | 2 | 2 | 2 |
| 1435 | 2 | 55 | 4 | 2 | 4 | 3 | 1 | 2 | 2 | 2 | 1 |
| 1434 | 2 | 58 | 4 | 2 | 1 | 2 | 2 | 2 | 2 | 2 | 2 |
| 1425 | 1 | 54 | 4 | 1 | 2 | 1 | 3 | 2 | 2 | 2 | 2 |
| 1426 | 2 | 52 | 4 | 2 | 3 | 3 | 2 | 2 | 2 | 1 | 2 |
| 1427 | 2 | 25 | 1 | 2 | 4 | 3 | 2 | 1 | 2 | 2 | 2 |
| 1432 | 2 | 20 | 1 | 1 | 3 | 2 | 2 | 2 | 2 | 2 | 2 |
| 1433 | 2 | 25 | 1 | 1 | 2 | 3 | 2 | 2 | 2 | 2 | 1 |
| 1437 | 2 | 52 | 4 | 2 | 4 | 3 | 4 | 2 | 2 | 2 | 1 |
| 1439 | 1 | 42 | 3 | 2 | 3 | 3 | 4 | 2 | 2 | 1 | 1 |
| 1440 | 2 | 18 | 1 | 1 | 2 | 2 | 2 | 2 | 2 | 2 | 2 |
| 1443 | 1 | 36 | 2 | 2 | 4 | 2 | 2 | 2 | 2 | 1 | 1 |
| 1442 | 2 | 29 | 1 | 2 | 1 | 2 | 2 | 2 | 2 | 2 | 1 |

|      |   |    |   |   |   |   |   |   |   |   |   |
|------|---|----|---|---|---|---|---|---|---|---|---|
| 1446 | 1 | 45 | 3 | 2 | 2 | 3 | 4 | 2 | 2 | 2 | 1 |
| 1465 | 2 | 64 | 4 | 2 | 2 | 3 | 1 | 2 | 2 | 2 | 1 |
| 1458 | 2 | 47 | 3 | 2 | 2 | 2 | 2 | 2 | 2 | 1 | 1 |
| 1456 | 2 | 26 | 1 | 1 | 3 | 3 | 4 | 2 | 2 | 2 | 1 |
| 1451 | 2 | 28 | 1 | 1 | 3 | 3 | 2 | 2 | 1 | 2 | 1 |
| 1448 | 1 | 24 | 1 | 1 | 2 | 3 | 2 | 2 | 1 | 1 | 1 |
| #### | 1 | 42 | 3 | 2 | 1 | 2 | 2 | 2 | 2 | 2 | 1 |
| #### | 1 | 18 | 1 | 1 | 2 | 2 | 2 | 2 | 1 | 2 | 1 |
| #### | 2 | 18 | 1 | 1 | 4 | 3 | 1 | 2 | 2 | 1 | 1 |
| #### | 2 | 60 | 4 | 2 | 2 | 1 | 1 | 2 | 2 | 2 | 1 |
| #### | 2 | 22 | 1 | 1 | 3 | 3 | 3 | 2 | 1 | 2 | 1 |
| #### | 2 | 22 | 1 | 2 | 2 | 2 | 2 | 2 | 2 | 2 | 1 |
| #### | 2 | 45 | 3 | 2 | 4 | 3 | 2 | 2 | 2 | 2 | 2 |
| #### | 2 | 21 | 1 | 2 | 2 | 3 | 4 | 2 | 1 | 1 | 1 |
| #### | 2 | 23 | 1 | 1 | 1 | 2 | 2 | 2 | 2 | 2 | 1 |
| #### | 2 | 33 | 2 | 2 | 2 | 2 | 2 | 2 | 2 | 2 | 1 |
| #### | 2 | 24 | 1 | 2 | 2 | 3 | 2 | 2 | 2 | 2 | 1 |
| #### | 2 | 23 | 1 | 2 | 3 | 3 | 2 | 2 | 2 | 2 | 1 |
| #### | 1 | 49 | 3 | 2 | 3 | 2 | 2 | 2 | 2 | 2 | 1 |
| #### | 1 | 26 | 1 | 2 | 1 | 2 | 2 | 2 | 2 | 2 | 1 |
| #### | 1 | 25 | 1 | 2 | 1 | 3 | 4 | 2 | 1 | 2 | 1 |
| 1797 | 1 | 27 | 1 | 1 | 4 | 3 | 3 | 2 | 2 | 1 | 2 |
| 1786 | 2 | 40 | 2 | 2 | 4 | 3 | 1 | 2 | 2 | 1 | 1 |
| 1792 | 1 | 27 | 1 | 1 | 3 | 1 | 1 | 2 | 2 | 2 | 2 |
| 1785 | 2 | 28 | 1 | 2 | 1 | 2 | 2 | 2 | 2 | 2 | 1 |
| 1791 | 1 | 55 | 4 | 2 | 2 | 2 | 1 | 2 | 2 | 1 | 2 |
| 1761 | 1 | 24 | 1 | 2 | 4 | 3 | 1 | 1 | 2 | 1 | 1 |
| 1762 | 1 | 30 | 1 | 2 | 3 | 4 | 3 | 2 | 2 | 2 | 1 |
| 1770 | 2 | 22 | 1 | 1 | 4 | 3 | 2 | 2 | 2 | 1 | 2 |
| 1772 | 2 | 24 | 1 | 2 | 3 | 4 | 1 | 2 | 2 | 2 | 1 |
| 1773 | 2 | 37 | 2 | 2 | 4 | 3 | 1 | 2 | 2 | 2 | 2 |
| 1799 | 1 | 24 | 1 | 1 | 2 | 3 | 1 | 1 | 1 | 2 | 2 |
| 1744 | 2 | 25 | 1 | 2 | 4 | 3 | 3 | 2 | 2 | 1 | 2 |
| 1711 | 1 | 22 | 1 | 1 | 3 | 3 | 2 | 2 | 2 | 2 | 2 |
| 1729 | 2 | 50 | 3 | 2 | 4 | 1 | 1 | 2 | 2 | 1 | 1 |
| 1724 | 1 | 20 | 1 | 1 | 2 | 1 | 1 | 2 | 2 | 1 | 2 |
| 1757 | 1 | 24 | 1 | 2 | 4 | 3 | 2 | 2 | 2 | 1 | 2 |
| 1754 | 2 | 30 | 1 | 2 | 1 | 1 | 1 | 1 | 1 | 1 | 1 |
| 1732 | 1 | 20 | 1 | 2 | 1 | 3 | 3 | 2 | 2 | 2 | 2 |
| 1743 | 1 | 19 | 1 | 1 | 1 | 2 | 2 | 1 | 1 | 1 | 1 |
| 1756 | 1 | 21 | 1 | 2 | 1 | 2 | 2 | 1 | 1 | 2 | 1 |
| 1746 | 2 | 22 | 1 | 1 | 1 | 1 | 1 | 2 | 2 | 2 | 1 |
| 1710 | 2 | 28 | 1 | 2 | 4 | 2 | 2 | 2 | 2 | 2 | 1 |
| 1749 | 2 | 23 | 1 | 2 | 2 | 4 | 2 | 2 | 1 | 1 | 1 |
| 1728 | 2 | 40 | 2 | 2 | 1 | 2 | 2 | 1 | 2 | 2 | 1 |
| 1727 | 2 | 24 | 1 | 2 | 3 | 1 | 2 | 1 | 1 | 1 | 2 |
| 1752 | 2 | 29 | 1 | 2 | 3 | 2 | 1 | 2 | 2 | 2 | 1 |
| 1725 | 2 | 19 | 1 | 2 | 4 | 3 | 3 | 2 | 2 | 2 | 1 |
| 1712 | 1 | 24 | 1 | 1 | 3 | 3 | 2 | 2 | 1 | 2 | 1 |

|      |   |    |   |   |   |   |   |   |   |   |   |
|------|---|----|---|---|---|---|---|---|---|---|---|
| 1758 | 2 | 57 | 4 | 2 | 4 | 3 | 2 | 1 | 1 | 1 | 1 |
| 1715 | 2 | 36 | 2 | 2 | 2 | 2 | 2 | 2 | 2 | 2 | 1 |
| #### | 2 | 21 | 1 | 2 | 1 | 1 | 3 | 2 | 2 | 2 | 1 |
| #### | 2 | 23 | 1 | 2 | 3 | 2 | 1 | 2 | 2 | 2 | 2 |
| #### | 2 | 18 | 1 | 1 | 4 | 3 | 3 | 2 | 1 | 2 | 1 |
| #### | 2 | 22 | 1 | 2 | 4 | 2 | 2 | 2 | 2 | 2 | 1 |
| #### | 2 | 18 | 1 | 1 | 4 | 1 | 1 | 2 | 2 | 2 | 1 |
| #### | 2 | 54 | 4 | 4 | 2 | 2 | 2 | 2 | 1 | 2 | 1 |
| #### | 1 | 22 | 1 | 2 | 3 | 1 | 1 | 2 | 1 | 1 | 2 |
| #### | 2 | 60 | 4 | 2 | 2 | 2 | 2 | 2 | 2 | 1 | 1 |
| 1716 | 1 | 26 | 1 | 1 | 2 | 4 | 3 | 2 | 2 | 2 | 1 |
| #### | 2 | 25 | 1 | 1 | 3 | 2 | 1 | 2 | 1 | 2 | 2 |
| 1755 | 1 | 27 | 1 | 1 | 3 | 3 | 2 | 2 | 2 | 2 | 2 |
| 1714 | 1 | 35 | 2 | 2 | 3 | 1 | 1 | 2 | 1 | 2 | 2 |
| 1795 | 1 | 28 | 1 | 2 | 2 | 2 | 2 | 2 | 2 | 2 | 1 |
| 1775 | 1 | 27 | 1 | 1 | 2 | 4 | 1 | 1 | 2 | 2 | 2 |
| 1784 | 1 | 60 | 4 | 2 | 2 | 1 | 3 | 2 | 2 | 1 | 2 |
| 1790 | 1 | 40 | 2 | 1 | 3 | 3 | 1 | 2 | 2 | 2 | 2 |
| 1789 | 2 | 35 | 2 | 2 | 4 | 4 | 4 | 1 | 2 | 2 | 1 |
| 1783 | 2 | 40 | 2 | 2 | 4 | 3 | 4 | 1 | 1 | 1 | 2 |
| #### | 1 | 20 | 1 | 1 | 3 | 3 | 2 | 2 | 2 | 2 | 1 |
| #### | 2 | 38 | 2 | 2 | 1 | 3 | 1 | 2 | 2 | 2 | 1 |
| #### | 2 | 20 | 1 | 2 | 1 | 1 | 1 | 2 | 2 | 2 | 1 |
| #### | 2 | 29 | 1 | 2 | 2 | 2 | 2 | 2 | 1 | 2 | 2 |
| #### | 1 | 22 | 1 | 2 | 2 | 3 | 2 | 2 | 2 | 2 | 1 |
| #### | 1 | 19 | 1 | 1 | 2 | 2 | 2 | 2 | 2 | 2 | 1 |
| #### | 1 | 25 | 1 | 1 | 2 | 2 | 2 | 2 | 2 | 2 | 1 |
| #### | 2 | 30 | 1 | 2 | 3 | 2 | 2 | 2 | 1 | 1 | 2 |
| 1759 | 1 | 25 | 1 | 2 | 1 | 1 | 1 | 2 | 1 | 1 | 1 |
| 1731 | 1 | 32 | 2 | 2 | 4 | 3 | 1 | 2 | 2 | 2 | 1 |
| 1774 | 2 | 40 | 2 | 2 | 3 | 2 | 2 | 2 | 2 | 2 | 1 |
| 1793 | 2 | 27 | 1 | 2 | 4 | 3 | 1 | 2 | 2 | 1 | 1 |
| #### | 2 | 28 | 1 | 1 | 1 | 1 | 3 | 2 | 1 | 2 | 1 |
| #### | 1 | 35 | 2 | 2 | 3 | 2 | 2 | 2 | 1 | 2 | 1 |
| #### | 2 | 23 | 1 | 1 | 3 | 3 | 1 | 2 | 2 | 2 | 1 |
| #### | 2 | 29 | 1 | 2 | 4 | 2 | 1 | 2 | 2 | 2 | 2 |
| #### | 2 | 35 | 2 | 2 | 4 | 2 | 2 | 2 | 2 | 2 | 1 |
| #### | 2 | 26 | 1 | 1 | 3 | 3 | 2 | 1 | 1 | 2 | 1 |
| #### | 2 | 30 | 1 | 2 | 4 | 1 | 3 | 2 | 2 | 1 | 2 |
| #### | 2 | 30 | 1 | 2 | 4 | 1 | 1 | 1 | 1 | 2 | 1 |
| #### | 2 | 24 | 1 | 1 | 3 | 2 | 2 | 2 | 2 | 2 | 1 |
| #### | 2 | 35 | 2 | 2 | 3 | 2 | 2 | 1 | 1 | 1 | 1 |
| #### | 2 | 50 | 3 | 2 | 2 | 1 | 1 | 2 | 2 | 2 | 1 |
| #### | 2 | 29 | 1 | 1 | 4 | 2 | 2 | 2 | 2 | 1 | 1 |
| #### | 1 | 21 | 1 | 1 | 4 | 2 | 1 | 1 | 1 | 2 | 1 |
| #### | 2 | 20 | 1 | 2 | 2 | 3 | 1 | 2 | 2 | 1 | 1 |
| #### | 2 | 21 | 1 | 2 | 3 | 3 | 2 | 2 | 2 | 1 | 2 |
| #### | 2 | 24 | 1 | 2 | 3 | 2 | 2 | 2 | 2 | 2 | 1 |
| #### | 1 | 23 | 1 | 2 | 3 | 3 | 2 | 2 | 1 | 2 | 1 |

|      |   |    |   |   |   |   |   |   |   |   |   |
|------|---|----|---|---|---|---|---|---|---|---|---|
| #### | 1 | 29 | 1 | 1 | 3 | 3 | 1 | 2 | 2 | 2 | 1 |
| #### | 1 | 30 | 1 | 1 | 4 | 2 | 2 | 2 | 1 | 2 | 2 |
| #### | 1 | 20 | 1 | 1 | 4 | 2 | 2 | 2 | 2 | 2 | 2 |
| #### | 1 | 40 | 2 | 1 | 3 | 1 | 3 | 2 | 2 | 2 | 1 |
| #### | 2 | 23 | 1 | 2 | 2 | 3 | 3 | 2 | 2 | 2 | 1 |
| #### | 2 | 20 | 1 | 2 | 4 | 3 | 1 | 2 | 2 | 2 | 2 |
| #### | 2 | 30 | 1 | 2 | 1 | 3 | 1 | 2 | 2 | 1 | 1 |
| #### | 1 | 55 | 4 | 2 | 2 | 3 | 2 | 2 | 2 | 2 | 1 |
| #### | 1 | 27 | 1 | 1 | 4 | 3 | 2 | 2 | 2 | 2 | 2 |
| #### | 1 | 32 | 2 | 1 | 4 | 2 | 2 | 1 | 1 | 2 | 1 |
| #### | 1 | 30 | 1 | 1 | 4 | 2 | 2 | 1 | 1 | 2 | 2 |
| #### | 1 | 38 | 2 | 2 | 3 | 2 | 2 | 1 | 2 | 1 | 1 |
| #### | 1 | 20 | 1 | 2 | 2 | 3 | 1 | 1 | 1 | 1 | 2 |
| 1753 | 2 | 18 | 1 | 2 | 2 | 1 | 2 | 2 | 2 | 1 | 1 |
| #### | 2 | 60 | 4 | 5 | 2 | 3 | 4 | 1 | 1 | 1 | 2 |
| 1794 | 2 | 28 | 1 | 1 | 3 | 3 | 2 | 2 | 2 | 2 | 2 |
| 1787 | 2 | 60 | 4 | 2 | 2 | 3 | 3 | 2 | 2 | 1 | 1 |
| 1788 | 1 | 43 | 3 | 1 | 4 | 3 | 2 | 2 | 2 | 2 | 1 |
| 1781 | 2 | 18 | 1 | 2 | 1 | 2 | 1 | 1 | 1 | 2 | 1 |
| 1780 | 2 | 19 | 1 | 1 | 3 | 2 | 2 | 2 | 2 | 2 | 2 |
| 1779 | 2 | 20 | 1 | 1 | 1 | 1 | 1 | 1 | 1 | 2 | 1 |
| 1782 | 1 | 35 | 2 | 2 | 2 | 2 | 2 | 2 | 2 | 2 | 1 |
| 1776 | 2 | 41 | 3 | 1 | 4 | 2 | 1 | 2 | 2 | 1 | 1 |
| 1777 | 2 | 22 | 1 | 2 | 4 | 3 | 2 | 1 | 1 | 2 | 1 |
| 1778 | 2 | 28 | 1 | 2 | 2 | 2 | 1 | 2 | 2 | 2 | 1 |
| 1765 | 2 | 50 | 3 | 2 | 1 | 3 | 2 | 1 | 2 | 2 | 1 |
| 1798 | 1 | 42 | 3 | 4 | 4 | 3 | 2 | 2 | 2 | 2 | 1 |
| #### | 1 | 27 | 1 | 1 | 3 | 1 | 2 | 2 | 2 | 1 | 1 |
| 1769 | 2 | 29 | 1 | 2 | 3 | 2 | 2 | 2 | 2 | 2 | 1 |
| 1713 | 2 | 43 | 3 | 2 | 4 | 2 | 2 | 2 | 1 | 2 | 1 |
| 1767 | 1 | 57 | 4 | 2 | 2 | 3 | 2 | 2 | 1 | 1 | 1 |
| 1766 | 1 | 32 | 2 | 1 | 4 | 3 | 2 | 2 | 2 | 1 | 2 |
| 1763 | 1 | 50 | 3 | 2 | 4 | 1 | 1 | 2 | 2 | 2 | 1 |
| 1764 | 2 | 27 | 1 | 2 | 3 | 1 | 1 | 2 | 2 | 2 | 1 |
| 1768 | 2 | 37 | 2 | 2 | 4 | 3 | 2 | 2 | 1 | 2 | 1 |
| 1760 | 1 | 18 | 1 | 1 | 2 | 2 | 2 | 1 | 2 | 2 | 1 |
| 1730 | 1 | 32 | 2 | 2 | 4 | 3 | 2 | 2 | 2 | 1 | 2 |
| 1737 | 1 | 22 | 1 | 1 | 3 | 3 | 2 | 2 | 1 | 2 | 2 |
| 1736 | 2 | 31 | 2 | 2 | 2 | 1 | 1 | 2 | 2 | 2 | 1 |
| 1734 | 2 | 30 | 1 | 2 | 2 | 2 | 2 | 2 | 2 | 1 | 1 |
| 1796 | 1 | 26 | 1 | 1 | 3 | 3 | 2 | 2 | 1 | 2 | 2 |
| 1733 | 2 | 25 | 1 | 2 | 2 | 3 | 1 | 2 | 2 | 2 | 1 |
| 1720 | 2 | 55 | 4 | 2 | 4 | 4 | 2 | 2 | 2 | 2 | 1 |
| 1722 | 2 | 35 | 2 | 2 | 4 | 3 | 2 | 2 | 2 | 2 | 1 |
| 1742 | 2 | 18 | 1 | 2 | 3 | 3 | 4 | 2 | 2 | 1 | 1 |
| 177  | 1 | 40 | 2 | 1 | 3 | 3 | 2 | 1 | 1 | 2 | 1 |
| 171  | 2 | 48 | 3 | 2 | 3 | 2 | 1 | 2 | 2 | 2 | 1 |
| 178  | 2 | 23 | 1 | 2 | 4 | 2 | 2 | 2 | 2 | 1 | 1 |
| 1735 | 2 | 35 | 2 | 2 | 4 | 3 | 1 | 2 | 2 | 2 | 1 |

|      |   |    |   |   |   |   |   |   |   |   |   |
|------|---|----|---|---|---|---|---|---|---|---|---|
| 1751 | 2 | 60 | 4 | 2 | 2 | 2 | 1 | 2 | 2 | 1 | 1 |
| 1750 | 2 | 60 | 4 | 2 | 1 | 3 | 1 | 2 | 2 | 2 | 1 |
| 1748 | 2 | 21 | 1 | 1 | 1 | 1 | 3 | 1 | 1 | 2 | 1 |
| 1738 | 1 | 20 | 1 | 1 | 3 | 2 | 2 | 1 | 1 | 2 | 1 |
| 1747 | 2 | 30 | 1 | 2 | 1 | 2 | 1 | 2 | 2 | 2 | 2 |
| 1745 | 1 | 20 | 1 | 1 | 4 | 2 | 2 | 2 | 2 | 2 | 1 |
| 1739 | 1 | 34 | 2 | 1 | 3 | 3 | 1 | 2 | 2 | 2 | 1 |
| 1741 | 2 | 24 | 1 | 1 | 1 | 2 | 1 | 2 | 1 | 1 | 1 |
| #### | 1 | 23 | 1 | 2 | 4 | 2 | 1 | 2 | 2 | 2 | 1 |
| 1725 | 2 | 48 | 3 | 2 | 2 | 2 | 1 | 2 | 1 | 1 | 2 |
| 1723 | 2 | 23 | 1 | 2 | 3 | 3 | 3 | 2 | 2 | 1 | 1 |
| 1721 | 2 | 35 | 2 | 2 | 3 | 3 | 3 | 2 | 2 | 1 | 2 |
| 1718 | 2 | 35 | 2 | 2 | 3 | 3 | 4 | 2 | 1 | 2 | 1 |
| 1719 | 1 | 24 | 1 | 1 | 3 | 3 | 1 | 2 | 2 | 2 | 1 |
| 172  | 1 | 26 | 1 | 1 | 3 | 3 | 2 | 2 | 1 | 1 | 2 |
| 173  | 1 | 58 | 4 | 2 | 4 | 4 | 4 | 2 | 2 | 1 | 1 |
| 174  | 2 | 27 | 1 | 2 | 2 | 3 | 1 | 2 | 1 | 1 | 1 |
| 175  | 1 | 35 | 2 | 1 | 4 | 2 | 2 | 1 | 2 | 1 | 2 |
| 176  | 2 | 30 | 1 | 2 | 4 | 3 | 1 | 2 | 1 | 2 | 2 |
| 1717 | 2 | 60 | 4 | 2 | 2 | 1 | 3 | 2 | 2 | 2 | 2 |
| 179  | 2 | 28 | 1 | 1 | 3 | 3 | 2 | 2 | 2 | 1 | 1 |
| 1740 | 2 | 35 | 2 | 2 | 1 | 3 | 2 | 1 | 1 | 2 | 2 |
| #### | 1 | 22 | 1 | 1 | 4 | 3 | 1 | 1 | 1 | 2 | 1 |
| #### | 1 | 30 | 1 | 2 | 2 | 2 | 1 | 2 | 1 | 2 | 2 |











0  
0  
1  
1  
1  
1  
1  
1  
1  
1  
1  
1  
1  
0  
1  
1  
1  
1  
1  
1  
1  
1  
1  
1  
1  
0  
0  
0  
0  
0  
0  
0  
1  
1  
1  
1  
1  
1  
1  
1  
1  
1  
1  
0  
0  
0  
0  
0  
0  
0  
0  
0



1  
1  
1  
1  
1  
1  
1  
1  
1  
1  
0  
0  
0  
0  
0  
0  
0  
0  
0  
0  
0  
0  
0  
1  
1  
1  
1  
1  
1  
1  
1  
1  
1  
1  
1  
1  
1  
1  
1  
1  
1  
0  
0  
0  
0  
0  
0  
1  
0  
0  
0





1  
1  
1  
1  
1  
1  
1  
1  
1  
1  
1  
1  
1  
1  
1  
0  
0  
0  
0  
0  
0  
0  
0  
0  
0  
0  
0  
0  
0  
0  
0  
0  
0  
1  
1  
1  
1  
1  
1  
1  
1  
1  
1  
1  
1  
1  
0  
0  
0  
0  
0  
0  
0  
0  
0
